# Supplementary material
Source: PubMed Central journal article supplement (PMC7309223)
Supplement: NIHMS1599046-supplement-1.pdf [file NIHMS1599046-supplement-1.pdf]

**Supplemental Table 1: CEGIR participants**

| Given Name | Surname     | Given Name | Surname        | Given Name           | Surname        |
|------------|-------------|------------|----------------|----------------------|----------------|
| J.Pablo    | Abonia      | Sandeep    | Gupta          | Robert               | Newbury        |
| Seema      | Aceves      | Frank      | Hamilton       | Quan                 | Nhu            |
| Samuel     | Almonte     | Kirk       | Harris         | Oghenekpaobor (Joel) | Oyibo          |
| Rachel     | Andrews     | Jennifer   | Harris         | Allisa               | Paliana        |
| Ashley     | Arrington   | Ikuo       | Hirano         | Zhaoxing             | Pan            |
| Nicoleta   | Arva        | Girish     | Hiremath       | Robbie               | Pesek          |
| Fred       | Atkins      | Nicole     | Holland-Thomas | Kathryn              | Peterson       |
| Dominique  | Bailey      | Lea        | Jacinto        | Heidi                | Poppendeck     |
| Alexis     | Berry       | Amir       | Kagalwalla     | Philip               | Putnam         |
| Bridget    | Besl        | Timothy    | Kaseta         | Fabian               | Rivera         |
| Scott      | Bolton      | David      | Katzka         | Marc                 | Rothenberg     |
| Peter      | Bonis       | Kaitlin    | Keeley         | Amanda               | Rudman-Spergel |
| Wendy      | Book        | Emad       | Khosh-Hemmat   | Kathleen             | Sable          |
| Kimberly   | Bray        | Paneez     | Khoury         | Alain                | Schoepfer      |
| Teresa     | Brown       | Eileen     | King           | Melissa              | Scott          |
| Cassandra  | Burger      | Kara       | Kliwer         | Rachel               | Sheridan       |
| Deirdre    | Burke       | Amy        | Klion          | Selma                | Sinanovic      |
| Jonathon   | Cahoon      | Jennifer   | Knowles        | Jonathan             | Spergel        |
| Kelley     | Capocelli   | Kendra     | Kocher         | MaryJo               | Strobel        |
| Mirna      | Cehade      | Ellyn      | Kodroff        | Kiki                 | Sun            |
| Margaret   | Collins     | Jeffrey    | Krischer       | Amy                  | Tasco          |
| Carla      | Davis       | Shay       | Kyle           | Crystal              | Tholen         |
| Evan       | Dellon      | John       | Leung          | Katherine            | Thompson       |
| Maureen    | DeMarshall  | Meredith   | Levy           | Tiffany              | Tomkinson      |
| Lauren     | DiTommaso   | Chris      | Liacouras      | Daisy                | Tran           |
| Ranjan     | Dohil       | Denise     | Mack           | Alexandra            | Tylicki        |
| Michael    | Eby         | Lisa       | Martin         | Tiina                | Urv            |
| Gary       | Falk        | Ellen      | Martin         | Mei-Lun              | Wang           |
| David      | Fleischer   | Talaya     | McCright-Gill  | Joshua               | Wechsler       |
| Heather    | Foote       | Paul       | Menard-Katcher | Barry                | Wershil        |
| Kelci      | Foss        | Calies     | Menard-Katcher | Lisa                 | Wheatley       |
| Joel       | Friedlander | Gabriela   | Mendoza        | Leah                 | Wilkey         |
| Patricia   | Fulkerson   | Melissa    | Mingler        | Guang-Yu             | Yang           |
| Glenn      | Furuta      | Mike       | Minnicozzi     | Angelika             | Zalewski       |
| Debra      | Geno        | Amanda     | Muir           | Amy                  | Zicarelli      |
| Nirmala    | Gonsalves   | Vincent    | Mukkada        |                      |                |
| Thomas     | Greuter     | Cristin    | Murray Petzold |                      |                |

**Supplemental Table 2: Patient Characteristics by CEGIR site**

| Institution                                          | Sample Count | Age (Years/SD) | Male (%) | EDP score (SD) | Peak Eosinophil Count per HPF (SD) |
|------------------------------------------------------|--------------|----------------|----------|----------------|------------------------------------|
| Ann & Robert H. Lurie Children's Hospital of Chicago | 1            | 8.4            | 100%     | 219            | 9.00                               |
| Children's Hospital Colorado                         | 45           | 10.9 ( 3.7 )   | 65%      | 217 ( 162 )    | 28.5 ( 33.6 )                      |
| Cincinnati Children's Hospital Medical Center        | 59           | 13.8 ( 5.1 )   | 85%      | 208 ( 159 )    | 35.6 ( 31.7 )                      |
| Rady Children's Hospital San Diego                   | 9            | 8.4 ( 2.7 )    | 50%      | 241 ( 204 )    | 9.75 ( 12.5 )                      |
| The Children's Hospital of Philadelphia              | 4            | 10.9 ( 2.5 )   | 67%      | 101 ( 248 )    | 23.0 ( 27.9 )                      |
| Tufts University                                     | 3            | 47.6 ( 22.9 )  | 100%     | 306 ( 25.2 )   | 26.0 ( 36.8 )                      |
| University of California San Diego                   | 1            | 67.1           | 100%     | 300            | 13.0                               |
| University of Colorado                               | 27           | 39.5 ( 8.0 )   | 50%      | 139 ( 146 )    | 33.7 ( 25.9 )                      |
| University of North Carolina School of Medicine      | 53           | 41.2 ( 14.8 )  | 51%      | 195 ( 165 )    | 41.3 ( 48.2 )                      |
| University of Pennsylvania                           | 35           | 38.6 ( 13.7 )  | 67%      | 186 ( 156 )    | 32.0 ( 29.8 )                      |

**Supplemental Table 3: Histologic and Endoscopic Scores by Group.**

|              |                                      | Group I     | Group II    | Group III   | Group IV    | Group V     |
|--------------|--------------------------------------|-------------|-------------|-------------|-------------|-------------|
| <b>EREFs</b> | <b>Edema</b>                         | 0.53 (0.51) | 0.75 (0.44) | 0.86 (0.36) | 0.94 (0.24) | 0.80 (0.42) |
|              | <b>Rings</b>                         | 0.39 (0.72) | 0.75 (0.87) | 0.51 (0.78) | 0.67 (0.84) | 0.20 (0.42) |
|              | <b>Exudates</b>                      | 0.39 (0.64) | 0.69 (0.75) | 0.69 (0.83) | 0.78 (0.81) | 0.70 (0.82) |
|              | <b>Furrows</b>                       | 0.61 (0.59) | 0.97 (0.65) | 1.20 (0.72) | 0.83 (0.62) | 1.40 (0.70) |
|              | <b>Stricture</b>                     | 0.13 (0.34) | 0.17 (0.38) | 0.09 (0.28) | 0.28 (0.46) | 0.00 (0.00) |
| <b>HSS</b>   | <b>Eosinophil Inflammation</b>       | 3.32 (1.85) | 3.81 (1.92) | 3.37 (2.22) | 3.83 (1.86) | 4.20 (1.81) |
|              | <b>Basal Zone Hyperplasia</b>        | 3.45 (2.20) | 4.03 (2.25) | 3.86 (2.55) | 4.17 (1.95) | 5.20 (1.93) |
|              | <b>Eosinophil Abscess</b>            | 0.18 (0.87) | 0.14 (0.59) | 0.17 (0.57) | 0.28 (1.18) | 0.00 (0.00) |
|              | <b>Eosinophil Surface Layering</b>   | 0.42 (1.08) | 0.72 (1.16) | 0.91 (1.56) | 0.39 (0.92) | 0.80 (1.32) |
|              | <b>Dilated Intercellular Spaces</b>  | 3.87 (2.48) | 4.14 (2.33) | 3.94 (2.65) | 4.44 (1.85) | 5.00 (1.89) |
|              | <b>Surface Epithelial Alteration</b> | 0.68 (1.34) | 1.14 (1.53) | 1.20 (1.81) | 1.17 (1.76) | 2.00 (1.83) |
|              | <b>Dyskeratotic Epithelial Cells</b> | 0.16 (0.72) | 0.36 (0.96) | 0.49 (1.38) | 0.78 (1.52) | 1.50 (2.01) |

\*Values are shown as mean (standard deviation).

**Supplemental Table 4: Patient Treatment Status and History by Group**

|                                        | Inactive   |      | Group I   |      | Group II  |      | Group III |      | Group IV  |      | Group V   |      | Total      |
|----------------------------------------|------------|------|-----------|------|-----------|------|-----------|------|-----------|------|-----------|------|------------|
| <b>Ongoing Diet Therapy</b>            | 50         | 50%  | 21        | 55%  | 17        | 47%  | 17        | 49%  | 10        | 56%  | 6         | 60%  | <b>121</b> |
| <b>Oral Systemic Steroids</b>          | 0          | 0%   | 0         | 0%   | 0         | 0%   | 0         | 0%   | 0         | 0%   | 0         | 0%   | <b>0</b>   |
| <b>PPI</b>                             | 34         | 34%  | 17        | 45%  | 15        | 42%  | 13        | 37%  | 7         | 39%  | 1         | 10%  | <b>87</b>  |
| <b>Swallowed Topical Steroids</b>      | 59         | 59%  | 21        | 55%  | 19        | 53%  | 13        | 37%  | 7         | 39%  | 6         | 60%  | <b>125</b> |
| <b>History of Steroid Usage</b>        | 68         | 68%  | 28        | 74%  | 25        | 69%  | 22        | 63%  | 14        | 78%  | 10        | 100% | <b>167</b> |
| <b>Response to Steroid (Symptom)</b>   | 50         | 50%  | 19        | 50%  | 15        | 42%  | 13        | 37%  | 8         | 44%  | 8         | 80%  | <b>113</b> |
| <b>Response to Steroid (Pathology)</b> | 44         | 44%  | 14        | 37%  | 12        | 33%  | 12        | 34%  | 7         | 39%  | 6         | 60%  | <b>95</b>  |
| <b>Disease Duration Mean, Years</b>    | 5.764      | 3.64 | 7.289     | 7.01 | 5.698     | 3.03 | 6.406     | 3.79 | 8.376     | 5.81 | 6.343     | 3.97 |            |
| <b>St.Dev.</b>                         |            |      |           |      |           |      |           |      |           |      |           |      |            |
| <b>Total Samples</b>                   | <b>100</b> |      | <b>38</b> |      | <b>36</b> |      | <b>35</b> |      | <b>18</b> |      | <b>10</b> |      | <b>237</b> |
